# Supplementary figures and images for: Cationic 2,6-bis(imino)pyridine iron and cobalt complexes: synthesis, structures, ethylene polymerisation and ethylene/polar monomer co-polymerisation studies
Source: Royal Society of Chemistry journal article supplement (doi:10.1039/b106614p), 2002-01-01

Molecular structure of **4**


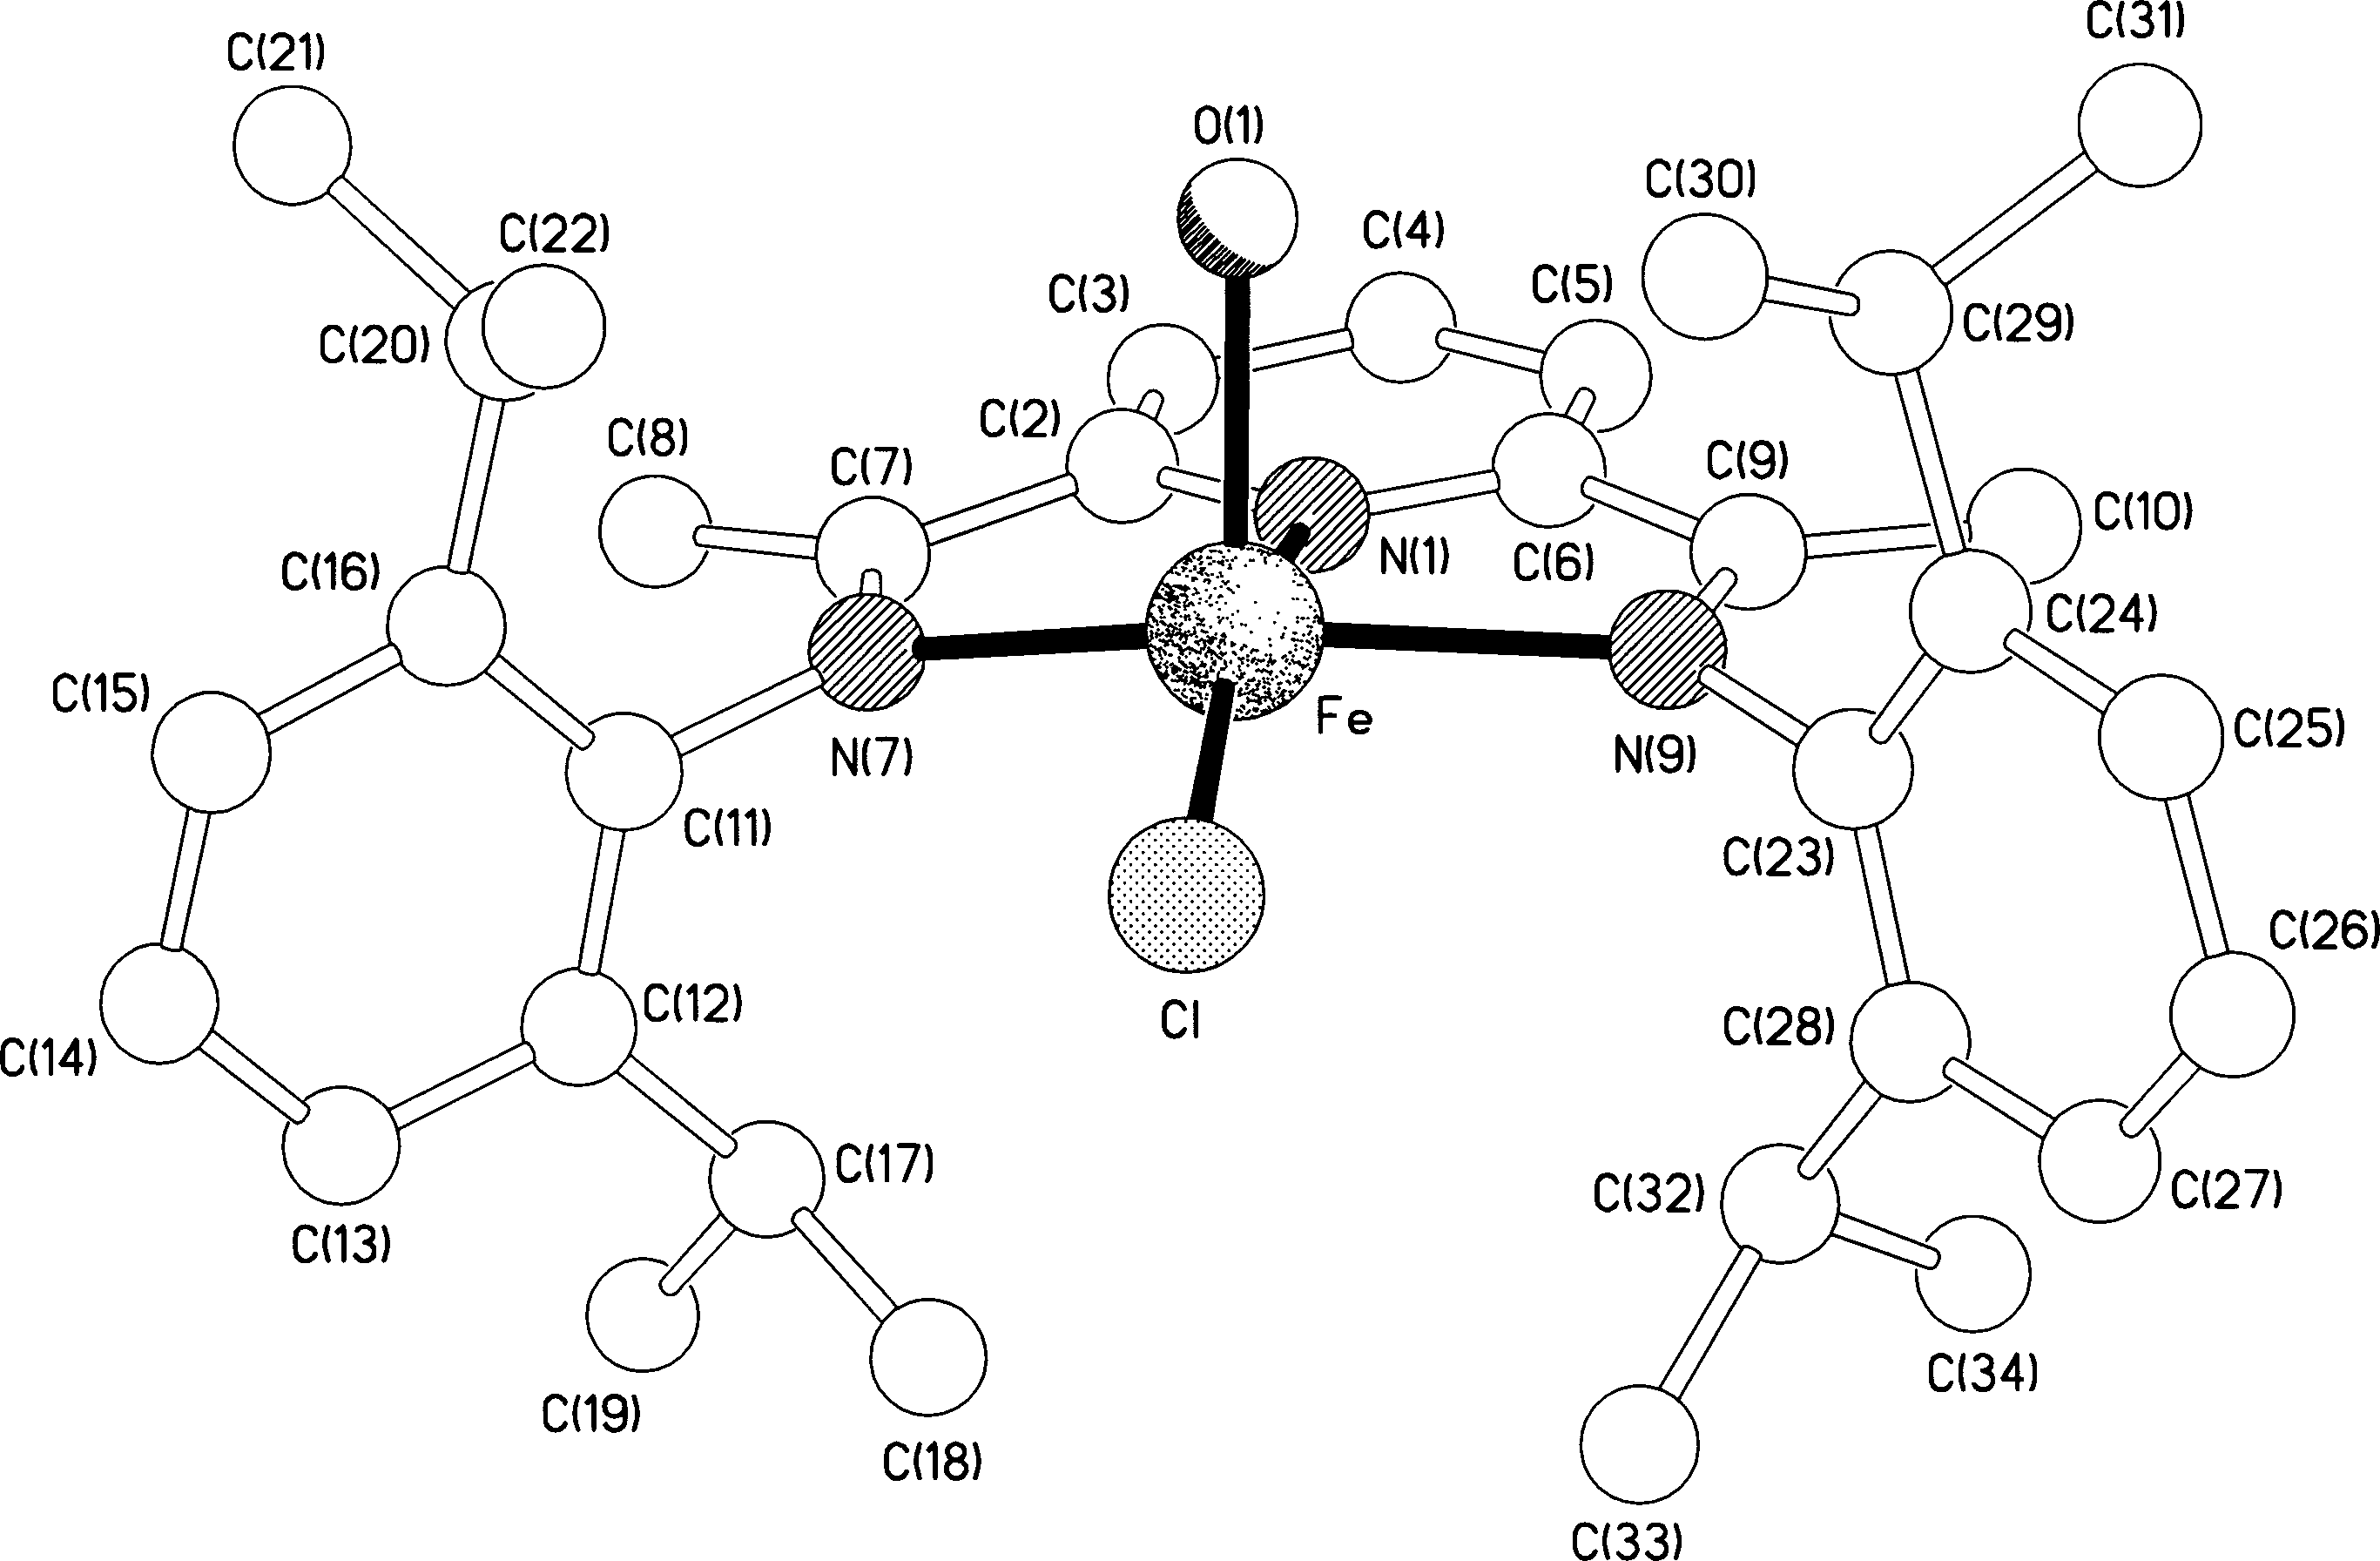

Supplement: b106614p.doc [file b106614p.doc]
